# Supplementary material
Source: PubMed Central journal article supplement (PMC4175124)
Supplement: 10-1055-s-0034-1383058-sup_gf837.pdf [file 10-1055-s-0034-1383058-sup_gf837.pdf]

# Folatmetabolismus und menschliche Fortpflanzung

## Folate Metabolism and Human Reproduction

### Autor

C. J. Thaler<sup>1,2</sup>

### Institute

<sup>1</sup> Klinik und Poliklinik für Frauenheilkunde und Geburtshilfe, Klinikum der Ludwig-Maximilians-Universität München, Campus Großhadern, Hormon- & Kinderwunschzentrum Großhadern, München

<sup>2</sup> Klinik und Poliklinik für Frauenheilkunde und Geburtshilfe, Klinikum der Ludwig-Maximilians-Universität München, Campus Innenstadt, Hormon- & Kinderwunschzentrum Innenstadt, München

### Schlüsselwörter

- assistierte Reproduktion
- Folatmetabolismus
- Homocystein
- menschliche Fortpflanzung
- Follikulogenese

### Key words

- assisted reproduction
- folate metabolism
- homocysteine
- human reproduction
- folliculogenesis

**eingereicht** 31. 7. 2014

**revidiert** 13. 8. 2014

**akzeptiert** 14. 8. 2014

### Bibliografie

**DOI** <http://dx.doi.org/10.1055/s-0034-1383058>  
 Geburtsh Frauenheilk 2014; 74: 1–7 © Georg Thieme Verlag KG Stuttgart · New York · ISSN 0016-5751

### Korrespondenzadresse

**Prof. Christian J. Thaler**  
 Hormon- & Kinderwunschzentrum Großhadern  
 Klinik und Poliklinik für Frauenheilkunde und Geburtshilfe  
 Klinikum der Ludwig-Maximilians-Universität München  
 Campus Großhadern  
 Marchioninstraße 15  
 81377 München  
 Thaler@med.uni-muenchen.de

### Zusammenfassung

Der Folatmetabolismus hat vielfältige Effekte auf ovarielle Funktion, Implantation, Embryogenese und den gesamten Verlauf der Schwangerschaft. Neben dem gut etablierten Einfluss auf die Inzidenz neuraler Fusionsdefekte finden sich Zusammenhänge zwischen verminderten Folsäure- und erhöhten HomocysteinKonzentrationen einerseits und gehäuften Spontanaborten und anderen Schwangerschaftskomplikationen andererseits. Zusätzlich zeigt sich bei Kinderwunschpatientinnen im Rahmen der IVF/ICSI-Behandlung ein deutlicher Zusammenhang zwischen Plasma-Folat-Konzentrationen und der Inzidenz dichorialer Geminischwangerschaften. Im Rahmen der ovariellen Hyperstimulation finden sich bei Trägerinnen der MTHFR-677T-Mutation unter einer Folsäure-Substitution mit täglich 0,4 mg negative Effekte auf die Zahl gewonnener Oozyten sowie die maximale Konzentration von Östradiol am Tag der Ovulationsauslösung. Diese Effekte sind offenbar vollständig kompensierbar durch Erhöhung der täglichen Folsäuredosis auf mind. 0,8 mg. Bei entsprechend substituierten Trägerinnen des MTHFR-677T-Genotyps finden sich die AMH-Konzentrationen signifikant erhöht, was auf einen Kompensationsmechanismus hindeuten könnte. Tatsächlich könnten die AMH-Konzentrationen homozygoter Trägerinnen des MTHFR-677TT-Genotyps allerdings überschätzt werden, denn bei ihnen konnten durchschnittlich fast 20% weniger Oozyten pro AMH-Einheit gewonnen werden als bei Individuen mit dem MTHFR-677CC-Wildtyp-Genotyp.

### Biochemie von Folaten und Folsäure

Als Folate bezeichnet man die natürlicherweise in Lebensmitteln vorkommenden Folsäureverbindungen, die einen Teil des Vitamin-B-Komplexes

### Abstract

Folate metabolism affects ovarian function, implantation, embryogenesis and the entire process of pregnancy. In addition to its well-established effect on the incidence of neural tube defects, associations have been found between reduced folic acid levels and increased homocysteine concentrations on the one hand, and recurrent spontaneous abortions and other complications of pregnancy on the other. In infertility patients undergoing IVF/ICSI treatment, a clear correlation was found between plasma folate concentrations and the incidence of dichorionic twin pregnancies. In patients supplemented with 0.4 mg/d folic acid undergoing ovarian hyperstimulation and oocyte pick-up, carriers of the MTHFR 677T mutation were found to have lower serum estradiol concentrations at ovulation and fewer oocytes could be retrieved from them. It appears that these negative effects can be compensated for in full by increasing the daily dose of folic acid to at least 0.8 mg. In carriers of the MTHFR 677TT genotype who receive appropriate supplementation, AMH concentrations were found to be significantly increased, which could indicate a compensatory mechanism. AMH concentrations in homozygous carriers of the MTHFR 677TT genotype could even be overestimated, as almost 20% fewer oocytes are retrieved from these patients per AMH unit compared to MTHFR 677CC wild-type individuals.

darstellen und essenzieller Nahrungsbestandteil sind. Insgesamt sind mehr als 150 Folatverbindungen bekannt, wobei diese sich jeweils durch einen Pteridin- und einen para-Aminobenzoesäurering auszeichnen, an dessen Carboxylende bis

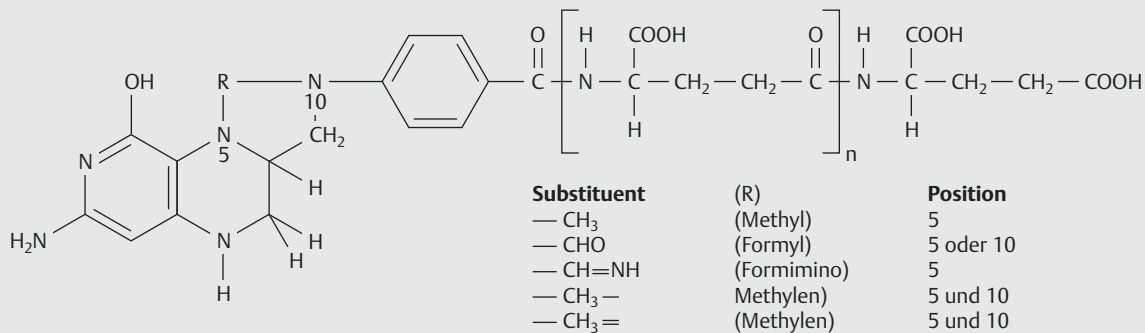

**Abb. 1** Folate zeichnen sich jeweils durch einen Pteridin- und einen para-Aminobenzoesäuerung aus, an dessen Carboxylende bis zu 8 Glutamatreste gekoppelt sind ( $n = 8$ ). Die synthetische Folsäure weist am Ende der Carboxylgruppe einen Monoglutamatrest ( $n = 1$ ) auf und stellt als Pteroylmono-

glutamat die stabilste Folatform dar. An den N-Positionen 5- und 10 können Methylengruppen gebunden werden. Die Methylengruppe an der N-Position 5 wird bei der Donation der Methylgruppe freigesetzt (aus [1]).

zu 8 Glutamatreste gekoppelt sind (● **Abb. 1**). Man spricht daher auch von Pteroylpolyglutamat. Davon abzugrenzen ist die Folsäure, eine synthetische Verbindung, die am Ende der Carboxylgruppe einen Monoglutamatrest aufweist und als Pteroylmonoglutamat die stabilste Folatform darstellt. Sie wird üblicherweise in Arzneimitteln und Nahrungsergänzungsmitteln eingesetzt [1]. Alle vitaminaktiven Verbindungen, seien sie natürlichen oder synthetischen Ursprungs, werden unter dem Oberbegriff Folat zusammengefasst. Da der Begriff „Folsäure“ nur für die synthetische Vitaminform verwendet wird, sind Bezeichnungen wie „Folsäurebedarf“ und „Folsäuremangel“ streng genommen nicht mehr korrekt [2]. Die einzelnen Folatverbindungen weisen eine unterschiedliche Absorptionsrate auf: So wird Folsäure nahezu quantitativ aufgenommen, während die Verfügbarkeit der Folate aus Nahrungsmitteln eingeschränkt und im Einzelfall schwer abschätzbar ist. Die Bioverfügbarkeit einzelner Folate wird primär beeinflusst vom Verhältnis der Mono- und Polyglutamate in der Nahrung [3], wobei die mittlere Verwertbarkeit bei einer gemischten Kost bei etwa 50% liegt [4].

Folate finden sich in grünem Blattgemüse (Folium: das Blatt) sowie in Vollkornprodukten. Angesichts der hohen Wasserlöslichkeit und der Hitze- und Lichtempfindlichkeit führen längere Lager- und Kochzeiten zu einem hohen Verlust an Folataktivität. Insgesamt ist die Folatversorgung der europäischen Bevölkerung unzureichend und dies betrifft besonders Menschen mit erhöhtem Folatbedarf, wie etwa Frauen mit Kinderwunsch und Schwangere. Die Deutsche Gesellschaft für Ernährung empfiehlt für Schwangere und Frauen mit Kinderwunsch die tägliche Aufnahme von mind. 0,55 mg Folsäure-Äquivalent, was auch bei bewusst folatreicher Ernährung ohne Zusatz synthetischer Folsäure nur selten erreicht wird [5].

### Metabolismus von Homocystein und Folsäure

Die hohe Bedeutung von Folat und einer adäquaten Zufuhr ergibt sich besonders aus dessen Rolle als Vorläufer von 5-Methyl-Tetrahydrofolat (Metafolin), welches wiederum als Methylgruppendonator für die Re-Methylierung von Homocystein zu Methionin fungiert (● **Abb. 2**). Entsprechend führt ein Folatmangel indirekt zu erhöhten Plasma-Homocystein-Konzentrationen. Sekundär ergeben sich auch geringere Konzentrationen an S-Adenosyl-Methionin, welches wiederum als wichtiger Methylgruppen-

donator, u. a. für epigenetische Vorgänge (Methylierung von Genen) und für elementare Prozesse des Zellmetabolismus (DNA-Synthese, Proteinsynthese) erforderlich ist.

Neben der Menge an aufgenommenen Folaten spielt die Funktion des Enzyms Methyl-Tetra-Hydrofolat-Reduktase (MTHFR) für die Verfügbarkeit von Metafolin und damit dessen Methylgruppen eine entscheidende Rolle [1] (● **Abb. 2**). Dies ist biologisch relevant angesichts mehrerer, relativ prävalenter Mutationen im MTHFR-Gen, welche die Stabilität und damit die Funktion des Enzyms wesentlich beeinflussen. Die häufigste MTHFR-Mutation ergibt sich durch einen Nucleotidaustausch in Position 677 des MTHFR-Gens, (C<T) was in Position 222 einen Aminosäureaustausch von Alanin nach Valin mit sich bringt [6–8]. Die entstehende thermolabile MTHFR-Variante zeigt bei homozygoten 677TT-Trägern einen Aktivitätsverlust um etwa 70%, bei heterozygoten 677CT-Individuen um 35%. In der kaukasischen Bevölkerung sind etwa 10% der Menschen homozygot (677TT) und 40% heterozygot (677CT) betroffen. Lediglich 50% zeigen den Wildtyp (677CC) und damit die unverminderte MTHFR-Aktivität. Klinisch bedeutsam ist der MTHFR-677C>T-Polymorphismus angesichts des hieraus resultierenden Risikos für erhöhte Homocysteinkonzentrationen und verminderte Verfügbarkeit von S-Adenosyl-methionin als Methylgruppendonator [9–11]. Dies kann allerdings durch erhöhte Aufnahme von Folsäure oder Metafolin kompensiert werden [1, 6–8, 11, 12].

### Klinische Bedeutung des Folatmetabolismus

Es finden sich umfangreiche Hinweise, wonach der Folatmangel alleine oder in Kombination mit entsprechenden MTHFR-Mutationen bzw. die resultierende Hyperhomocysteinämie mit höheren Risiken für Schwangerschaftskomplikationen, etwa der intrauterinen Wachstumsretardierung oder gehäuften Früh- und Fehlgeburten, assoziiert sind [1, 12, 13]. Dieser Aspekt erscheint klinisch von erheblicher Bedeutung, zumal betroffene Patientinnen mit rezidivierenden Spontanaborten (RSA) durch Gabe von 0,8 mg Folsäure innerhalb weniger Wochen eine Normalisierung der zunächst erhöhten Homocysteinkonzentrationen zeigen [13]. Tatsächlich ist dieser Effekt am deutlichsten für RSA-Patientinnen mit einer MTHFR-677T-Mutation, denn diese Frauen hatten zunächst die höchsten, nach der Folsäuretherapie dagegen die niedrigsten Homocysteinkonzentrationen [13].

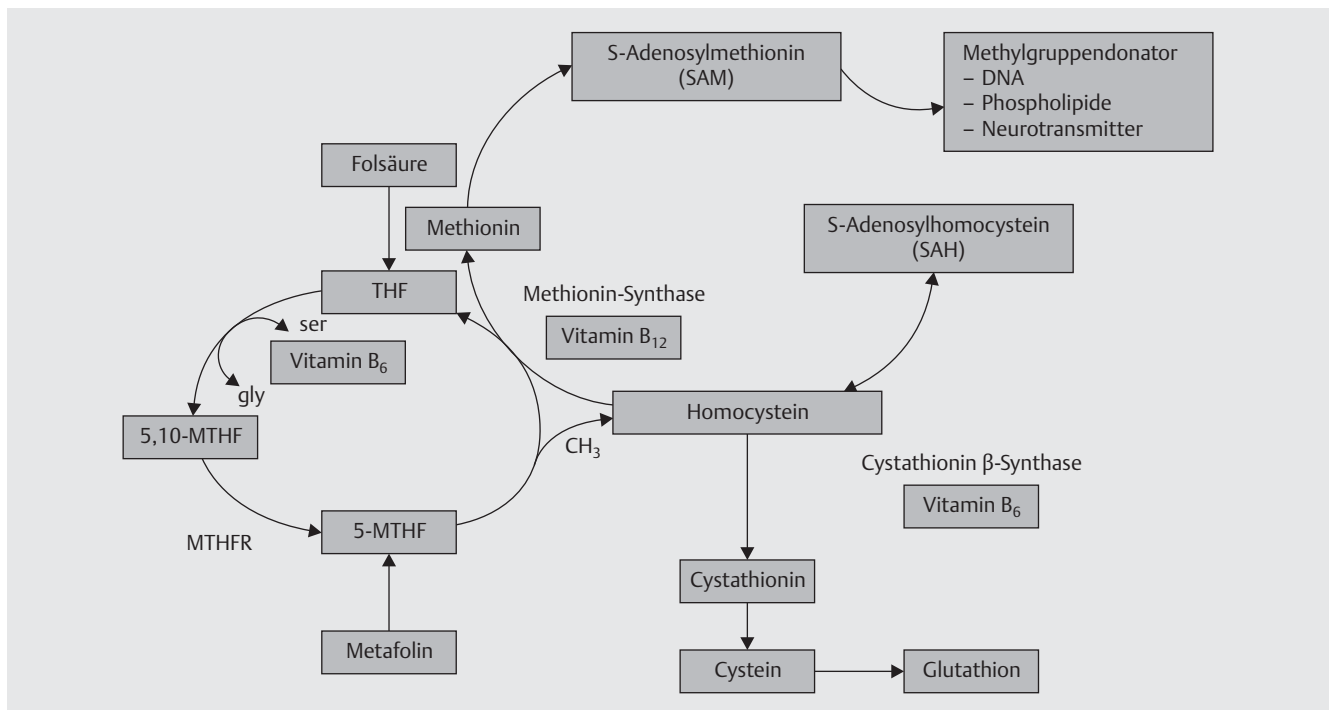

**Abb. 2** Folsäure bzw. Folate sind Vorläufer von 5-Methyl-Tetrahydrofolat (Metafolin), das wiederum als Methylgruppendonor für die Re-Methylierung von Homocystein zu Methionin fungiert. Entsprechend führt ein Folatmangel indirekt zu erhöhten Plasma-Homocystein-Konzentrationen. Sekun-

där ergeben sich auch geringere Konzentrationen an S-Adosyl-Methionin, welches wiederum als wichtiger Methylgruppendonor, u. a. für epigenetische Vorgänge (Methylierung von Genen) und für elementare Prozesse des Zellmetabolismus (DNA-Synthese, Proteinsynthese) erforderlich ist.

### Folsäuresubstitution und neurale Fusiondefekte

Am eindrucksvollsten sind die Effekte der Folsäure-Fortikation auf die Inzidenz neuraler Fusionsdefekte (NRD) belegt. Bereits Mitte der 1960er-Jahre vermutet [14,15], konnten in den 1980er- und 1990er-Jahren umfangreiche empirische Belege für einen präventiven Effekt des Vitamins erbracht werden [15–22]. Schließlich konnten Goh et al. anhand einer Metaanalyse von 8 Fallkontrollstudien zeigen, dass die perikonzeptionelle Supplementierung mit folsäurehaltigen Multivitaminpräparaten (Folsäuredosis 360–800 µg/d; fortgesetzt während des 1. Trimesters) das NRD-Risiko um 33% vermindert (Odds Ratio [OR]: 0,67; 95%-Konfidenzintervall: 0,58–0,77) [23]. In ihrer Metaanalyse von 3 Kohortenstudien und einer prospektiv randomisiert kontrollierten Studie ermittelten Blencowe et al. sogar ein um 62% reduziertes NRD-Risiko, wenn präkonzeptionell Folsäuresupplemente zugeführt wurden (95%-KI: 0,49–0,71) [24].

Angesichts dieser Daten praktizieren mehr als 50 Länder inzwischen Anreicherungsprogramme zur Verbesserung der Folatversorgung. So werden in den USA und in Kanada Mehle und Frühstückszerealien mit Folat angereichert, und hier konnte trotz der relativ geringen Konzentration (zusätzliche Folsäureaufnahme 80 bis 200 µg/d) eine Reduktion der NRD-Prävalenz um 19–23% [25–27] und der Spina bifida um 31% [28] erreicht werden.

### Folsäuresubstitution und an-/oligoovulatorische Sterilität

Ein zunächst ungeahnter Einfluss der Folsäuresubstitution auf Ovulation und nachfolgende Konzeptionsraten ergibt sich aus einer Subgruppenanalyse der Nurses Health Study [29]: Hier fand sich das Risiko einer an-/oligoovulatorischen Sterilität signifikant und dosisabhängig durch regelmäßige Einnahme von

Folsäure vermindert, und bei Frauen mit der höchsten täglichen Folsäureeinnahme (oberste Quintile) fand sich die Inzidenz einer anovulationsbedingten Sterilität um 59% reduziert.

### Folatmetabolismus und assistierte Reproduktion

Umfangreiche Effekte des Folatmetabolismus auf Rahmenaspekte der assistierten Fortpflanzung ergeben sich aus der flächendeckenden Studie von Paul Haggarty et al. in der Grampian Region von Nord-Ost-Schottland [30]. Hier wurden bei insgesamt 602 Patientinnen im Rahmen von Behandlungszyklen mittels In-vitro-Fertilisation (IVF) oder intrazytoplasmatischer Spermatozoen-Injektion (ICSI) sehr aufwendig in Einzelinterviews die regelmäßige Aufnahme von Folat und Vitamin B<sub>12</sub> ermittelt. Gleichzeitig wurden die Konzentrationen von Plasmafolat und Homocystein gemessen. Völlig überraschend ergab diese Auswertung, dass Frauen mit hoher täglicher Folsäureeinnahme, hohen Plasmafolatkonzentrationen sowie hohen Plasmavitamin-B<sub>12</sub>-Konzentrationen signifikant häufiger Gemini konzipierten. Tatsächlich fand sich bei der Auswertung aller IVF/ICSI-Patientinnen nach Transfer von 2 entwicklungsfähigen Embryonen die Plasmafolatkonzentration neben dem Lebensalter als wesentlicher Einflussfaktor auf die Rate klinischer Geminischwangerschaften (Abb. 3) [30].

Weitere Hinweise auf den Zusammenhang von Folsäuremetabolismus und IVF-Schwangerschaftsraten ergab eine prospektive Studie von Broxmer et al. [31]: Sie analysierten Konzentrationen von Homocystein, Vitamin B<sub>12</sub> (Cobalamin) und Folat in Blut und Follikelflüssigkeiten von IVF-Patientinnen und untersuchte deren Einfluss auf die Schwangerschaftsraten nach Single Embryo

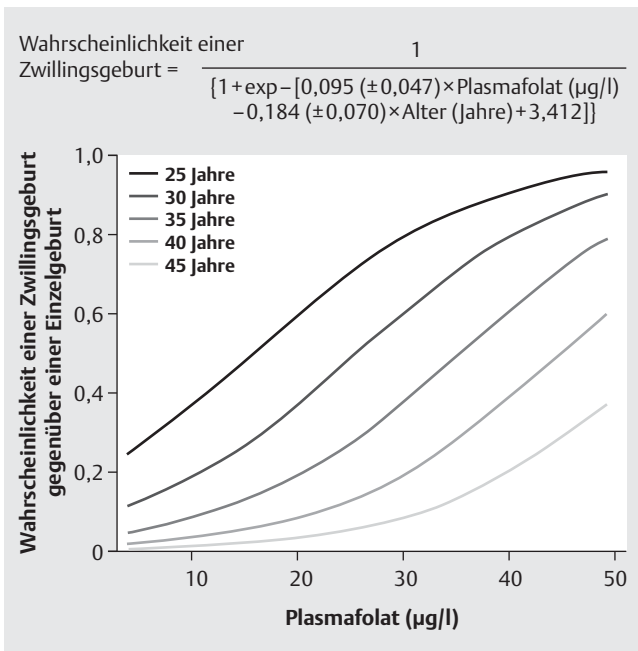

**Abb. 3** Wahrscheinlichkeit einer Geminischwangerschaft nach IVF/ICSI und dem nachfolgenden Transfer von 2 entwicklungsfähigen Embryonen (Y-Achse). Die Geminiwahrscheinlichkeit ist vom Alter der Patientinnen abhängig (je jünger, umso höher). Zusätzlich findet sich die Geminiwahrscheinlichkeit in jeder Altersgruppe positiv korreliert mit der Plasmafolatkonzentrationen (X-Achse) (aus [30]).

**Tab. 1** Bei der Betrachtung unterschiedlicher ethnischer Populationen findet sich eine negative Beziehung zwischen der MTHFR-677TT-Homozygotie und der Inzidenz spontan konzipierter dichorialischer Geminigeburten: Bei Asiatinnen werden relativ viele MTHFR-677TT-homozygote Individuen (20%) beschrieben, und hier sind dichoriale Geminigeburten relativ selten (6 auf 1000). Bei Afrikanerinnen ist die Inzidenz spontan konzipierter dichorialischer Geminigeburten mit 30 pro 1000 relativ hoch, während die Inzidenz der MTHFR-677TT-Homozygotie unterhalb der Nachweisgrenze liegt. Die kaukasische Bevölkerung nimmt bei dieser Gegenüberstellung mit 11–13 spontan konzipierten Geminigeburten auf 1000 und mit einer MTHFR-677TT-Homozygotie von 9% eine Mittelstellung ein (modifiziert nach [23]).

|                 | Zwillingsinzidenz<br>(1/1 000) | TT-Homozygotie<br>(%) |
|-----------------|--------------------------------|-----------------------|
| Afrikaner       | 32,1                           | 0,0                   |
| ▶ Ghana         |                                |                       |
| ▶ Westafrika    |                                |                       |
| Kaukasier       | 11,0–13,0                      | 9,0                   |
| ▶ Niederlande   |                                |                       |
| ▶ Zentraleuropa |                                |                       |
| Asiaten         | 6,0                            | 20,0                  |
| ▶ Hongkong      |                                |                       |
| ▶ Südchina      |                                |                       |

Transfer. Hier zeigte sich eine positive Korrelation zwischen plasmatischen Cobalaminkonzentrationen und günstiger embryonaler Morphologie sowie ein signifikanter Zusammenhang zwischen hohen Folatkonzentrationen in der Follikelflüssigkeit und nachfolgenden Schwangerschaftsraten (adjustierte Odds Ratio 3,26;  $p < 0,03$ ). Die Autoren zogen den Schluss, dass der lokale Folat/Homocysteinmetabolismus in der Follikelflüssigkeit erheb-

liche Bedeutung für die resultierende Embryogenese sowie die nachfolgende Schwangerschaftsrate besitzt [31].

## Folatmetabolismus und ovarielle Funktion

### ▼ MTHFR-677C>T-Polymorphismus und dichoriale Gemininzidenz

Eigene Kohortenuntersuchungen zeigen, dass bei Müttern spontan konzipierter dichorialischer Gemini gegenüber Einlingsmüttern der funktionseinschränkende MTHFR-677T-Genotyp hochsignifikant seltener nachweisbar ist [32]: Während sich bei 159 Einlingsmüttern die bekannte Genotypverteilung der mitteleuropäischen Bevölkerung nachweisen ließ (49% CC; 42% CT; 50% TT), fanden sich bei den Zwillingsmüttern lediglich 23% mit hetero- und 5% mit homozygotem T-Allel. Hieraus errechnet sich für T-Allel-Träger eine signifikante Reduktion der Gemininzidenz auf 0,43 (0,21–0,84;  $p = 0,008$ ) [32]. Diese negative Korrelation von MTHFR-677T-Auftreten und der Inzidenz spontan konzipierter dichorialischer Geminigeburten findet sich auch bei der weltweiten Betrachtung unterschiedlicher ethnischer Populationen wieder: tatsächlich werden bei Asiatinnen mit der hier bekannten relativ geringen Inzidenz spontaner Geminigeburten (6 auf 1000) relativ viele 677T-homozygote Individuen (20%) beschrieben, gegenüber afrikanischen Regionen, in denen die spontane Inzidenz dichorialischer Gemini mit 30 pro 1000 relativ hoch ist und in denen die Inzidenz der 677T-Homozygotie offenbar unterhalb der Nachweisgrenze liegt. Die kaukasische Bevölkerung nimmt bei dieser Gegenüberstellung mit 11–13 dichorialischen Geminigeburten auf 1000 und einer 677T-Homozygotie von knapp 10% jeweils eine Mittelstellung ein (● **Tab. 1**) (Zusammenstellung in [32]).

### MTHFR-677C>T-Polymorphismus und dichoriale Gemininzidenz

In nachfolgenden Untersuchungen analysierten wir die Frage nach dem biologischen Mechanismus für den Einfluss der MTHFR-677T-Mutation auf die Inzidenz dichorialischer Gemini: Konkret untersuchten wir dabei den Effekt der Mutation auf Follikulogenese und Ovulation, auf die Fertilisation und/oder die Implantation. Wir nutzten hierzu das Modell der kontrollierten ovariellen Hyperstimulation und das der In-vitro-Fertilisation. Zunächst konnten wir an insgesamt 992 Oozyten zeigen, dass sich innerhalb der 3 unterschiedlichen MTHFR-677CT-Genotypen weder die Fertilisationsraten in vitro noch die Implantationsraten signifikant unterschieden [33]. Allerdings fanden sich im Rahmen der kontrollierten ovariellen Hyperstimulation signifikante Effekte des MTHFR-677T-Genotyps auf FSH-Bedarf, Östradiolkonzentration und Zahl asservierter Oozyten: Trägerinnen der T-Mutation zeigten einerseits eine signifikant höhere Gesamtmenge an appliziertem rekombinanten FSH ( $p < 0,03$ ), gleichzeitig aber signifikant geringere maximale Östradiolkonzentrationen ( $p < 0,002$ ) und signifikant weniger asservierte Oozyten ( $p < 0,006$ ). Diese Effekte waren umso ausgeprägter, je älter die betroffenen Kinderwunschpatientinnen waren [33]. In anschließenden Studien konnten wir nachweisen, dass auch Granulosa-Luteinzell-Primärkulturen von IVF/ICSI-Patientinnen mit dem MTHFR-677T-Genotyp unter standardisierten Bedingungen in vitro signifikant geringere Östradiolsyntheseraten zeigen [34]. Dabei war der MTHFR-Effekt offenbar unabhängig von Expression und Funktion der FSH- und LH-Rezeptoren, denn die Stimula-

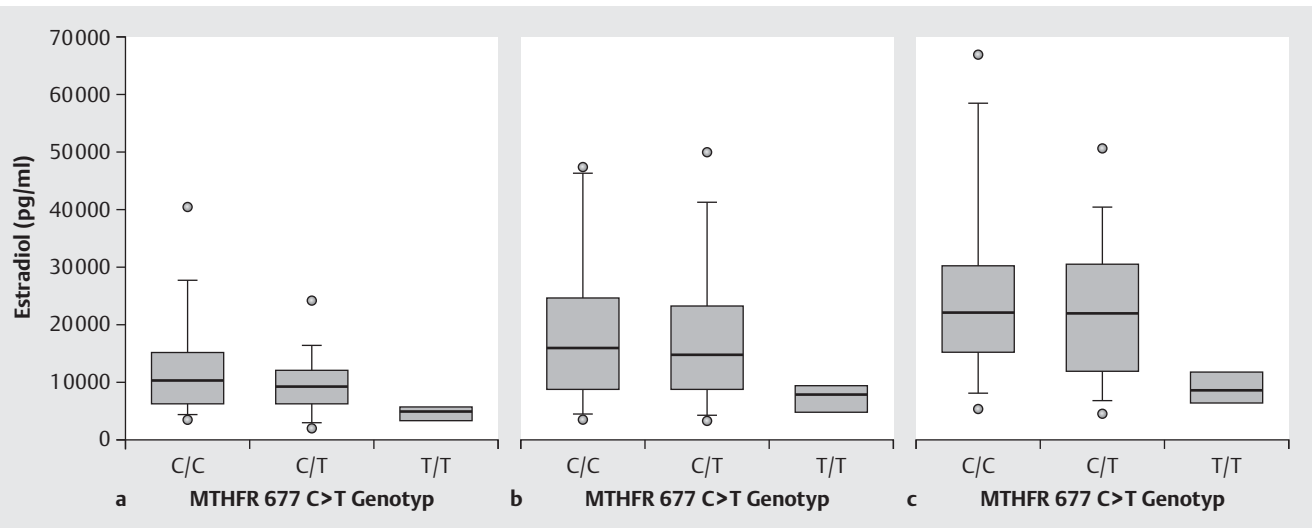

**Abb. 4a bis c** Estradiolproduktion humaner Granulosazellen, die aus den Follikelflüssigkeiten von IVF/ICSI-Patientinnen gewonnen und 72 Stunden kultiviert wurden. Granulosazellen von homozygoten Trägerinnen der MTHFR-677TT-Mutation zeigten eine signifikant geringere Estradiolsynthese und -freisetzung ( $p < 0,006$ ). Dieser Effekt fand sich in gleicher Weise bei

unstimulierten (a) wie auch bei FSH- (b) und LH-stimulierten (c) Granulosazellen und dies spricht dafür, dass der MTHFR-677T-Effekt nicht primär über die Expression oder Funktion der Gonadotropinrezeptoren vermittelt wird (aus [34]).

tionsraten durch rekombinantes FSH und LH waren unabhängig vom MTHFR-677CT-Genotyp (Abb. 4a bis c) [34].

#### MTHFR 677-C>T-Polymorphismus und erhöhte Folsäuresubstitution

Umfangreiche Untersuchungen legen den Schluss nahe, dass die erhöhten Risiken für neurale Fusionsdefekte [11, 12, 14–29] und Spontanaborte [35] sowie erhöhte Homocysteinkonzentrationen im Zusammenhang mit der MTHFR-677T-Mutation [13] durch eine erhöhte Folatzufuhr kompensierbar sind. Tatsächlich waren unsere eigenen initialen Untersuchungen zum Einfluss der MTHFR-677T-Mutation auf die Inzidenz dichorialer Geminischwangerschaften unter einer Substitution mit der in dieser Zeit empfohlenen Dosis von lediglich 0,4 mg Folsäure/Tag entstanden [32]. Auch bei unseren Studien zu MTHFR-677T-Effekten auf ovarielle Hyperstimulation und Estradiolsynthese lag die tägliche Folsäuresubstitution lediglich bei 0,4 mg/d [33]. Die US-amerikanische Studie von Rosen et al. legte dann erstmals den Schluss nahe, dass unter einer in den USA üblichen deutlich höheren Folatzufuhr (Folsäurezusatz in Mehl und Zerealien, höher dosierte Vitamin-B-Tabletten) der MTHFR-677T-Effekt auf die ovarielle Hyperstimulation reversibel ist [36]. In einer Anschlussstudie untersuchten wir daher 271 IVF/ICSI-Patientinnen, die täglich mind. 0,8 mg Folsäure bzw. 0,4 mg Folsäure in Kombination mit 0,4 mg Metafolin erhalten hatten. Um die Compliance hinsichtlich dieser Folsäuresubstitution zu verifizieren, wurde eine Stichprobe von 71 dieser Patientinnen in Einzelinterviews auf Regelmäßigkeit und Dosierung der Folsäureeinnahme befragt und hierbei wurde in allen Fällen bestätigt, dass die rezeptierte Folsäuresupplementation regelmäßig und korrekt eingenommen worden war (Dr. Roman Pavlik, persönliche Mitteilung). Tatsächlich fanden sich unter dieser erhöhten Folsäuredosierung gegenüber unserer Erstpublikation unter 0,4 mg Folsäure/Tag deutliche Veränderungen für die Eckdaten der Hyperstimulationsbehandlung: Im Gegensatz zu unserer Erstpublikation zeigten sich jetzt keine unmittelbaren MTHFR-677T-Effekte auf FSH-Bedarf oder Oozytenzahl. Allerdings bestätigte sich im Rahmen der multiplen

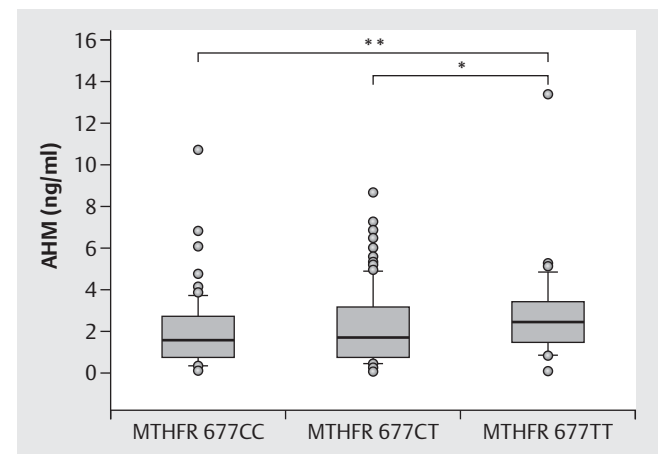

**Abb. 5** Unter der Substitution mit mind. 0,8 mg Folsäure/Tag finden sich bei IVF/ICSI-Patientinnen mit homozygoter MTHFR-677TT-Mutation signifikant höhere AMH-Konzentrationen als bei heterozygoten MTHFR-677CT-Patientinnen (\*  $p < 0,04$ ) und bei den Wild-Type-MTHFR-677CC-Patientinnen (\*\*  $p < 0,002$ ). Dies ist bemerkenswert angesichts der Tatsache, dass sich zwischen den unterschiedlichen MTHFR-677-Genotypen keine Unterschiede in der Gesamtzahl gewonnener Oozyten fanden (aus [37]).

linearen Regressionsanalyse weiterhin der negative Einfluss des MTHFR-677TT-Genotyps auf die Zahl gewonnener Eizellen ( $p = 0,008$ ) [37]. Diese zunächst unerwartete Konstellation scheint möglicherweise erklärbar angesichts signifikant erhöhter AMH-Konzentrationen bei Trägerinnen des MTHFR-677T-Genotyps. Tatsächlich lagen die durchschnittlichen AMH-Konzentrationen von homozygoten Trägerinnen des MTHFR-677T-Genotyps hoch signifikant ( $p = 0,002$ ) und von heterozygoten Trägerinnen des MTHFR-677CT-Genotyps signifikant ( $p = 0,04$ ) über dem der Patientinnen mit dem MTHFR-677CC-Wildtyp (Abb. 5) [37]. Die erhöhten AMH-Werte von Trägerinnen des MTHFR-

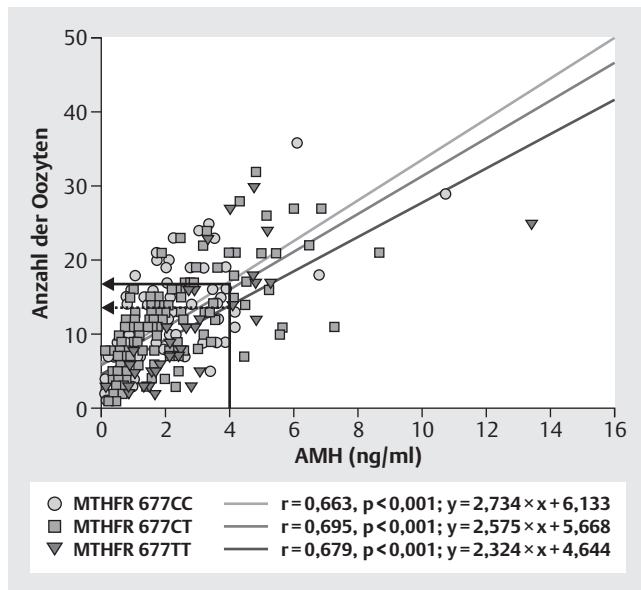

**Abb. 6** Die beschriebene Korrelation zwischen AMH-Konzentration und der Zahl gewonnener Oozyten nach kontrollierter ovarieller Hyperstimulation und Follikelpunktion findet sich auch in signifikanter ( $p < 0,001$ ) Weise bei individueller Darstellung der 3 MTHFR-677-Genotypen wieder. Allerdings stellt sich die Korrelationsgerade der IVF/ICSI-Patientinnen mit homozygoter MTHFR-677TT-Mutation (dunkelgraue Korrelationsgerade) nach unten, d. h. in Richtung geringerer Oozytenzahlen, verschoben dar, d. h. in Richtung geringerer Oozytenzahlen verschoben. So finden sich z. B. bei Patientinnen mit AMH-Konzentration von 4 ng/ml und dem MTHFR-677TT-Genotyp durchschnittlich etwa 13 Oozyten (Pfeil mit unterbrochener Linie nach links), dagegen bei gleichem Stimulationschema durchschnittlich 16 Oozyten (Pfeil mit durchgehender Linie nach links), wenn sie den Wild-Type-MTHFR-677CC-Genotyp besitzen. Dieser Aspekt scheint klinisch relevant, da die AMH-Konzentration bei homozygoten MTHFR-677TT-Mutationsträgerinnen zumindest hinsichtlich der zu erwartenden Oozytenzahlen um fast 20% überschätzt werden könnten (modifiziert nach [37]).

677T-Genotyps signalisieren eine erhöhte Rate initial rekrutierter Follikel und dies könnte auf einen kompensatorischen Effekt hinweisen, mit dem sich die zunächst verminderte zyklische Rekrutierung der Trägerinnen des MTHFR-677T-Genotyps unter erhöhter Folatfortifikation wieder kompensiert. Im Ergebnis gleicht die Folatsubstitution mit mind. 0,8 mg also die negativen MTHFR-677T-Effekte auf die Gesamtzahl asservierter Oozyten offenbar komplett aus und scheint daher zumindest für IVF/ICSI-Patientinnen ratsam. Diese erhöhte Folsäuresubstitution hat zumindest bei Trägerinnen des MTHFR-677T-Genotyps den Nebenbefund relativ erhöhter AMH-Konzentrationen [37]. Für alle 3 MTHFR-677CT-Genotypen bestätigte sich die beschriebene signifikante Korrelation zwischen AMH-Konzentration und Oozytenzahl ( $p < 0,001$ ), wobei die Regressionsgerade für den MTHFR-677CC-Wild-Type gegenüber den MTHFR-677-TT-Individuen um fast 20% nach oben verschoben ist (◉ **Abb. 6**; [37]). Diese Daten haben durchaus auch praktische Bedeutung für die klinische Routine. Hier sollte darauf geachtet werden, dass AMH-Werte von 677-TT-Patientinnen, zumindest bei erhöhter Folatversorgung, im Durchschnitt um etwa 20% höher ausfallen und damit als „falsch zu hoch“ interpretiert werden können. Tatsächlich zeigt sich angesichts der Regressionsgeraden in ◉ **Abb. 6**, dass für ein und denselben AMH-Wert bei gleichem Stimulationschema in homozygoten Trägerinnen des MTHFR-677TT-Genotyps um fast 20% geringere Oozytenzahlen zu erwarten sind. Es

empfiehlt sich also, in die sorgfältige Bewertung der AMH-Konzentration auch den individuellen MTHFR-677CT-Genotyp und die Folatversorgung einzubeziehen.

### Fazit für die Praxis

Der Folatmetabolismus hat vielfältige Effekte auf ovarielle Funktion, Implantation, Embryogenese und den gesamten Verlauf der Schwangerschaft. Neben dem gut etablierten Einfluss auf die Inzidenz neuraler Fusionsdefekte finden sich Zusammenhänge zwischen verminderten Folsäure- und erhöhten Homocystein-konzentrationen einerseits und gehäufteten Spontanaborten und anderen Schwangerschaftskomplikationen andererseits. Zusätzlich zeigt sich bei Kinderwunschpatientinnen im Rahmen der IVF/ICSI-Behandlung ein deutlicher Zusammenhang zwischen Plasma-Folat-Konzentrationen und der Inzidenz dichorialer Geminischwangerschaften. Im Rahmen der ovariellen Hyperstimulation finden sich bei MTHFR-677-T-Patientinnen unter einer Folsäure-Substitution mit täglich 0,4 mg negative Effekte auf die Zahl gewonnener Oozyten sowie die maximalen Konzentration von Östradiol am Tag der Ovulationsauslösung. Diese Effekte sind offenbar vollständig kompensierbar durch Erhöhung der täglichen Folsäuredosis auf mind. 0,8 mg und diese tägliche Dosis scheint zumindest für IVF/ICSI-Patientinnen ratsam. Bei entsprechend substituierten Trägerinnen des MTHFR-677TT-Genotyps finden sich die AMH-Konzentrationen signifikant erhöht, was auf einen Kompensationsmechanismus hindeuten könnte. Tatsächlich könnten die AMH-Konzentrationen homozygoter MTHFR 677 TT-Trägerinnen allerdings überschätzt werden, denn bei ihnen konnten durchschnittlich fast 20% weniger Oozyten pro AMH-Einheit gewonnen werden als bei Trägerinnen des MTHFR-677CC-Wild-Types.

### Danksagung

Meinen besonderen Dank möchte ich an dieser Stelle Herrn Professor Friese sagen. Er hatte in den vergangenen Jahren wesentlichen Anteil daran, dass die Säule der Gynäkologischen Endokrinologie und Reproduktionsmedizin an den Frauenkliniken der LMU personell, strukturell und apparativ stabilisiert und gestärkt werden konnte.

### Interessenkonflikt

Ich habe für Merck Selbstmedikation und Aristo Pharma Vorlesungen über Folsäure gehalten.

### Literatur

- 1 Ströhle A, Wolters M, Willers J et al. Mikronährstoffe in den verschiedenen Lebensphasen der Frau (Teil 3) – Schwangerschaft: Nahrung für einen optimalen Start ins Leben. *Gyne* 2014; 5: 33–39
- 2 Brönstrup A. Folat und Folsäure. *Ernähr Umschau* 2007; 9: 538–544
- 3 Ohrvik VE, Witthoft CM. Human folate bioavailability. *Nutrients* 2011; 3: 475–490
- 4 Sauberlich HE, Kretsch MJ, Skala JH et al. Folate requirement and metabolism in nonpregnant women. *Am J Clin Nutr* 1987; 46: 1016–1028
- 5 Deutsche Gesellschaft für Ernährung e.V. Referenzwerte für die Nährstoffzufuhr: Folat. Online: <http://www.dge.de/pdf/ws/Referenzwerte-2013-Folat.pdf>; Stand: 23.07.2014

- 6 Frosst P, Blom HJ, Milos R et al. A candidate genetic risk factor for vascular disease: a common mutation in methylenetetrahydrofolate reductase. *Nat Genet* 1995; 10: 111–113
- 7 Kang SS, Zhou J, Wong PW et al. Intermediate homocysteinemia: a thermolabile variant of methylenetetrahydrofolate reductase. *Am J Hum Genet* 1988; 43: 414–421
- 8 McAndrew PE, Brandt JT, Pearl DK et al. The incidence of the gene for thermolabile methylene tetrahydrofolate reductase in African Americans. *Thromb Res* 1996; 83: 195–198
- 9 Verhoeff BJ, Trip MD, Prins MH et al. The effect of a common methylenetetrahydrofolate reductase mutation on levels of homocysteine, folate, vitamin B12 and on the risk of premature atherosclerosis. *Atherosclerosis* 1998; 141: 161–166
- 10 Harmon DL, Woodside JV, Yarnell JW et al. The common 'thermolabile' variant of methylene tetrahydrofolate reductase is a major determinant of mild hyperhomocysteinaemia. *QJM* 1996; 89: 571–577
- 11 Jacques PF, Bostom AG, Williams RR et al. Relation between folate status, a common mutation in methylenetetrahydrofolate reductase, and plasma homocysteine concentrations. *Circulation* 1996; 93: 7–9
- 12 Ströhle A, Wolters M, Hahn A. Nährstoffsupplemente – Möglichkeiten und Grenzen. Teil 2: Ausgewählte Risikogruppen – Supplemente in der Schwangerschaft. *Med Monatsschr Pharm* 2013; 36: 252–266
- 13 Nelen WL, Blom HJ, Thomas CM et al. Methylenetetrahydrofolate reductase polymorphism affects the change in homocysteine and folate concentrations resulting from low dose folic acid supplementation in women with unexplained recurrent miscarriages. *J Nutr* 1998; 128: 1336–1341
- 14 Hibbard ED, Smithells RW. Folic acid metabolism and human embryopathy. *Lancet* 1965; 1: 1254
- 15 Laurence KM, James N, Miller MH et al. Double-blind randomised controlled trial of folate treatment before conception to prevent recurrence of neural-tube defects. *Br Med J (Clin Res Ed)* 1981; 282: 1509–1511
- 16 Czeizel AE, Dudás I. Prevention of the first occurrence of neural-tube defects by periconceptional vitamin supplementation. *N Engl J Med* 1992; 327: 1832–1835
- 17 Czeizel AE. Controlled studies of multivitamin supplementation on pregnancy outcomes. *Ann N Y Acad Sci* 1993; 678: 266–275
- 18 Smithells RW, Sheppard S, Schorah CJ et al. Apparent prevention of neural tube defects by periconceptional vitamin supplementation. *Arch Dis Child* 1981; 56: 911–918
- 19 Smithells RW, Sheppard S, Schorah CJ et al. Possible prevention of neural-tube defects by periconceptional vitamin supplementation. *Lancet* 1980; 1: 339–340
- 20 Smithells RW, Sheppard S, Wild J et al. Prevention of neural tube defect recurrences in Yorkshire: final report. *Lancet* 1989; 2: 498–499
- 21 Smithells RW. Multivitamins for the prevention of neural tube defects. How convincing is the evidence? *Drugs* 1989; 38: 849–854
- 22 Prevention of neural tube defects: results of the Medical Research Council Vitamin Study. MRC Vitamin Study Research Group. *Lancet* 1991; 338: 131–137
- 23 Goh YI, Bollano E, Einarson TR et al. Prenatal multivitamin supplementation and rates of congenital anomalies: a meta-analysis. *J Obstet Gynaecol Can* 2006; 28: 680–689
- 24 Blencowe H, Cousens S, Modell B et al. Folic acid to reduce neonatal mortality from neural tube disorders. *Int J Epidemiol* 2010; 39 (Suppl. 1): i110–i121
- 25 Choumenkovitch SF, Selhub J, Wilson PW et al. Folic acid intake from fortification in United States exceeds predictions. *J Nutr* 2002; 132: 2792–2798
- 26 Quinlivan EP, Gregory JF 3rd. Effect of food fortification on folic acid intake in the United States. *Am J Clin Nutr* 2003; 77: 221–225
- 27 Dietrich M, Brown CJ, Block G. The effect of folate fortification of cereal-grain products on blood folate status, dietary folate intake, and dietary folate sources among adult non-supplement users in the United States. *J Am Coll Nutr* 2005; 24: 266–274
- 28 Williams LJ, Mai CT, Edmonds LD et al. Prevalence of spina bifida and anencephaly during the transition to mandatory folic acid fortification in the United States. *Teratology* 2002; 66: 33–39
- 29 Chavarro JE, Rich-Edwards JW, Rosner BA et al. Use of multivitamins, intake of B vitamins, and risk of ovulatory infertility. *Fertil Steril* 2008; 89: 668–676
- 30 Haggarty P, McCallum H, McBain H et al. Effect of B vitamins and genetics on success of in-vitro fertilisation: prospective cohort study. *Lancet* 2006; 367: 1513–1519
- 31 Boxmeer JC, Macklon NS, Lindemans J et al. IVF outcomes are associated with biomarkers of the homocysteine pathway in monofollicular fluid. *Hum Reprod* 2009; 24: 1059–1066
- 32 Hasbargen U, Lohse P, Thaler CJ. The number of dichorionic twin pregnancies is reduced by the common MTHFR 677C>T mutation. *Hum Reprod* 2000; 15: 2659–2662
- 33 Thaler CJ, Budiman H, Ruebsamen H et al. Effects of the common 677C>T mutation of the 5,10-methylenetetrahydrofolate reductase (MTHFR) gene on ovarian responsiveness to recombinant follicle-stimulating hormone. *Am J Reprod Immunol* 2006; 55: 251–258
- 34 Hecht S, Pavlik R, Lohse P et al. Common 677C>T mutation of the 5,10-methylenetetrahydrofolate reductase gene affects follicular estradiol synthesis. *Fertil Steril* 2009; 91: 56–61
- 35 Quéré I, Mercier E, Bellet H et al. Vitamin supplementation and pregnancy outcome in women with recurrent early pregnancy loss and hyperhomocysteinemia. *Fertil Steril* 2001; 75: 823–825
- 36 Rosen MP, Shen S, McCulloch CE et al. Methylenetetrahydrofolate reductase (MTHFR) is associated with ovarian follicular activity. *Fertil Steril* 2007; 88: 632–638
- 37 Pavlik R, Hecht S, Ochsenkühn R et al. Divergent effects of the 677C>T mutation of the 5,10-methylenetetrahydrofolate reductase (MTHFR) gene on ovarian responsiveness and anti-Müllerian hormone concentrations. *Fertil Steril* 2011; 95: 2257–2262
